# Supplementary material for: Towards a universal model for the foaming behavior of surfactants: a case study on per- and polyfluoroalkyl substances (PFAS)
Source: Royal Society of Chemistry journal article supplement (doi:10.1039/d4sm00931b), 2024-01-01
Supplement: d4sm00931b2.pdf [file d4sm00931b2.pdf]

## Supporting Information

# **Towards a Universal Model for the Foaming Behavior of Surfactants: A Case Study on Per- and Polyfluoroalkyl Substances (PFAS)**

Muchu Zhou, Reza Foudazi\*

*School of Sustainable Chemical, Biological and Materials Engineering, The University of  
Oklahoma, Norman, OK 73019, USA*

---

\* Corresponding Author. Email: [rfoudazi@ou.edu](mailto:rfoudazi@ou.edu).

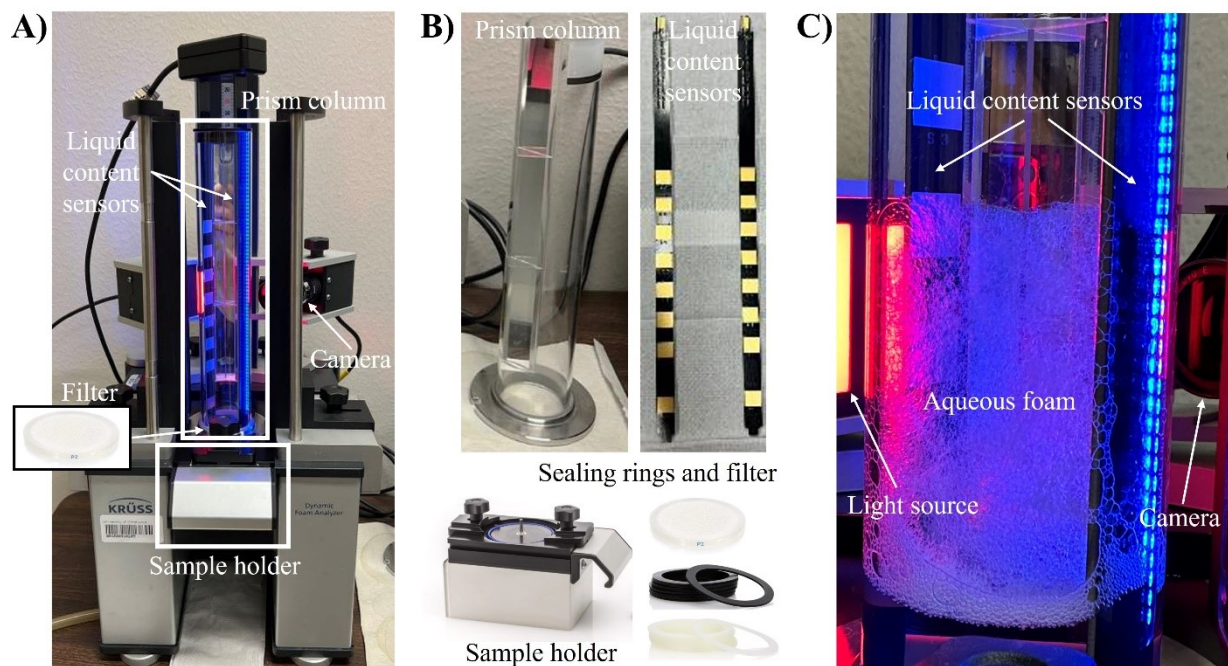

**Figure S1.** The foam analyzer (*Krüß Scientific, DFA 100*) used in this study: **A)** *DFA 100* setup overview; **B)** details showing the elements of prism column, liquid content sensors, O-rings, glass filter, and sample holder; and **C)** foam sample in the prism column used for morphology observation by using the camera on the back.

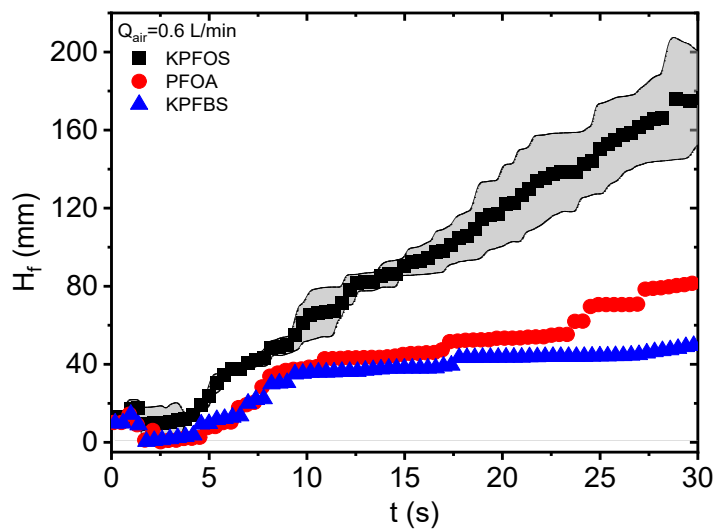

**Figure S2.** Foam height of 0.4 mM KPFOs, PFOA, and KPFBs aqueous foams during 30 s of aeration. The pore size range of filter was 40-100  $\mu\text{m}$ , and the air flow rate was 0.6 L/min.

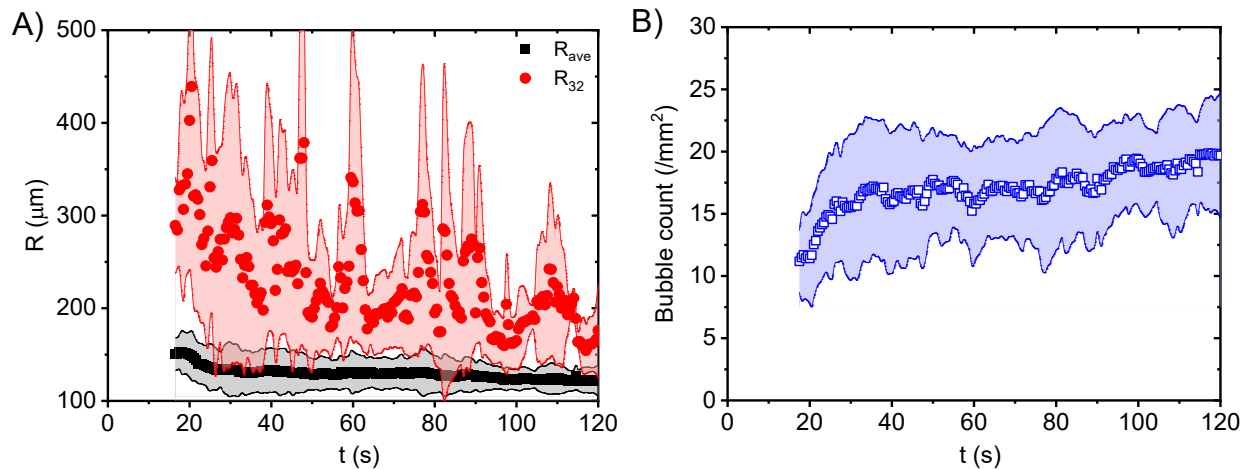

**Figure S3. A)** Average bubble radius including average bubble radius and Sauter mean bubble radius, and **B)** bubble count per area of 0.4 mM KPFO aqueous foams during foaming process by using 0.2 L/min air flow rate. The filter size was 40-100  $\mu\text{m}$ .

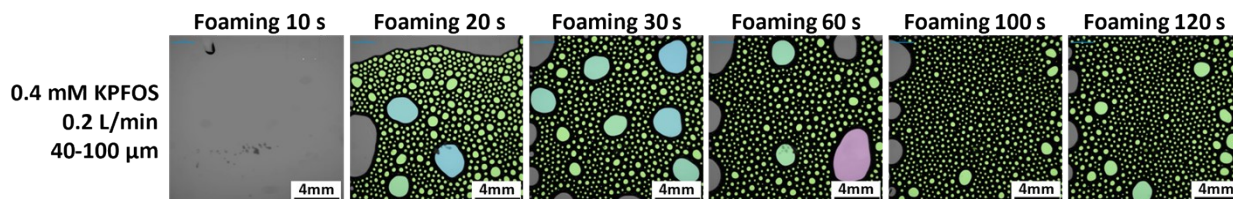

**Figure S4.** Foam structure at 10, 20, 30, 60, 100 and 120 s during 120 s of foaming for KPFO at a given bulk concentration of 0.4 mM by using the air flow rate of 0.2 L/min and the glass filter with a pore size range of 40-100  $\mu\text{m}$ . The scale bar is 4 mm.

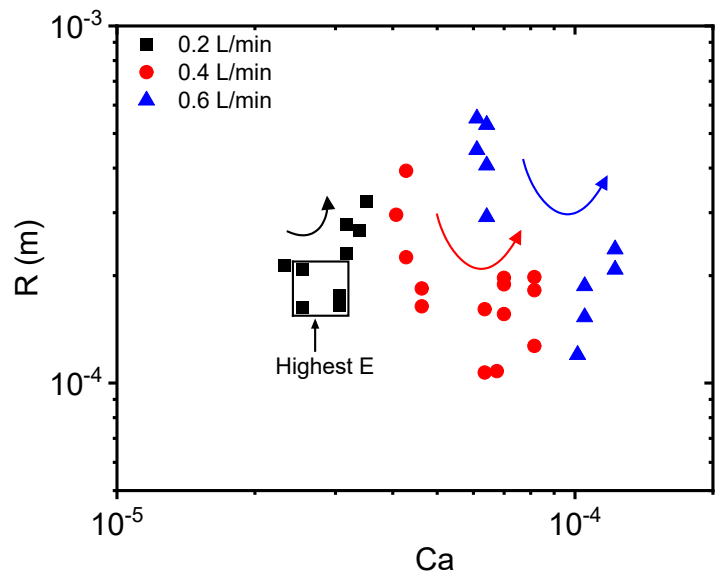

**Figure S5.** Sauter mean radius of KPFO aqueous foams with the Capillary number.

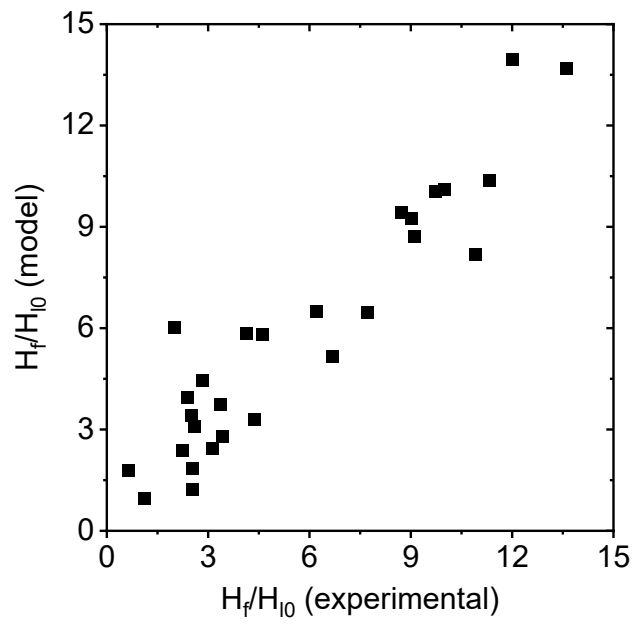

**Figure S6.** Predicted expansion rate of foaming for KPFO aqueous solutions by using *Equation (14)*, compared to the experimental expansion rate of foaming for KPFO aqueous solutions.

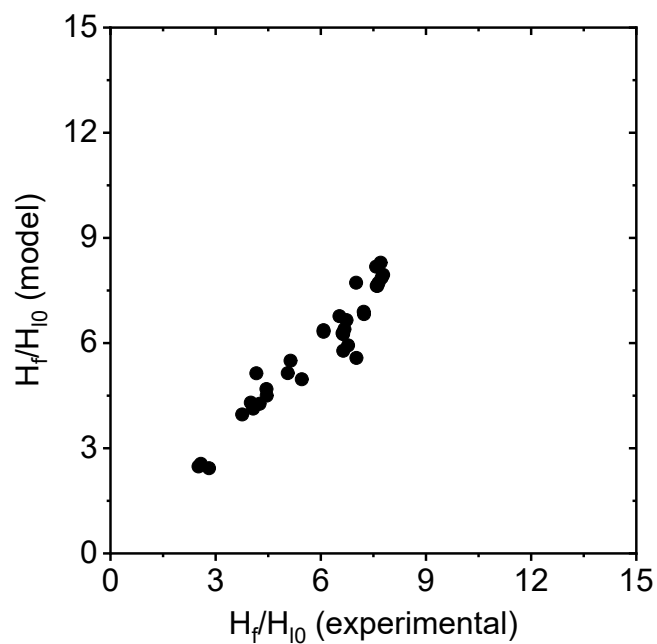

**Figure S7.** Predicted expansion rate of foaming for PFOA aqueous solutions by using *Equation (15)*, compared to the experimental expansion rate of foaming for PFOA aqueous solutions.

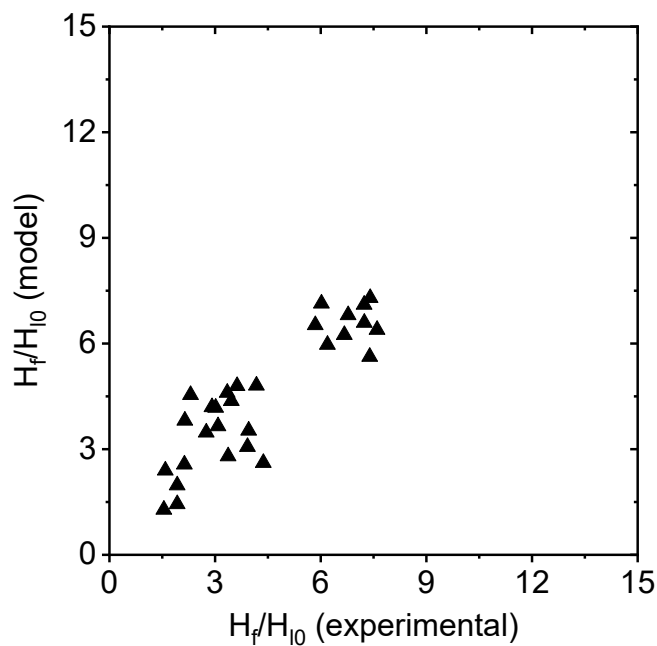

**Figure S8.** Predicted expansion rate of foaming for KPFBS aqueous solutions by using *Equation (16)* compared to the experimental expansion rate of foaming for KPFBS aqueous solutions.

**Table S1.** Average bubble radius and Sauter mean bubble radius of KPFOS foams in steady state sparged by using filters with different pore size ranges.

| <b>Average bubble radius</b>     |                     |
|----------------------------------|---------------------|
| $D_f = 40-100$<br>$\mu\text{m}$  | $122.33 \pm 0.30$   |
| $D_f = 16-40 \mu\text{m}$        | $84.10 \pm 2.37$    |
| <b>Sauter mean bubble radius</b> |                     |
| $D_f = 40-100$<br>$\mu\text{m}$  | $162.73 \pm 5.34$   |
| $D_f = 16-40 \mu\text{m}$        | $380.70 \pm 109.70$ |

**Table S2.** Fitted equations for the relationship between the various dimensionless numbers and foaming expansion rate for KPFOs with different bulk concentrations.

| Dimensionless number | $Q_{air}$ (L/min) | Equation                                                                             | $R^2$   |
|----------------------|-------------------|--------------------------------------------------------------------------------------|---------|
| $Re_b$               | 0.2               | $\frac{H_f}{H_{10}} = 0.18612Re_b^{-2.6647}$                                         | 0.88308 |
|                      | 0.4               | $\frac{H_f}{H_{10}} = 1.04766Re_b^{-1.9498}$                                         | 0.83175 |
|                      | 0.6               | $\frac{H_f}{H_{10}} = 5.35512Re_b^{-1.26729}$                                        | 0.96281 |
| $Ca$                 | 0.2               | $\frac{H_f}{H_{10}} = e^{(-3.36 \times 10^{10}Ca^2 + 1.85 \times 10^6Ca - 23.7815)}$ | 0.43259 |
|                      | 0.4               | $\frac{H_f}{H_{10}} = e^{(-3.79 \times 10^9Ca^2 + 4.70 \times 10^5Ca - 12.5314)}$    | 0.42501 |
|                      | 0.6               | $\frac{H_f}{H_{10}} = e^{(-1.17 \times 10^9Ca^2 + 2.29 \times 10^5Ca - 8.69762)}$    | 0.90268 |
| $We_b$               | 0.2               | $\frac{H_f}{H_{10}} = 2.52 \times 10^{-8}We_b^{-1.64739}$                            | 0.74524 |
|                      | 0.4               | $\frac{H_f}{H_{10}} = 8.90 \times 10^{-10}We_b^{-2.13558}$                           | 0.76102 |
|                      | 0.6               | $\frac{H_f}{H_{10}} = 6.79 \times 10^{-6}We_b^{-1.46065}$                            | 0.75671 |
| $Fr_b$               | 0.2               | $\frac{H_f}{H_{10}} = 17169.38Fr_b - 8.88804$                                        | 0.78223 |
|                      | 0.4               | $\frac{H_f}{H_{10}} = 2481.44Fr_b - 5.1587$                                          | 0.82486 |
|                      | 0.6               | $\frac{H_f}{H_{10}} = 1091.20Fr_b - 1.49395$                                         | 0.95948 |
| $Bq$                 | 0.2               | $\frac{H_f}{H_{10}} = 0.00121Bq - 2.40746$                                           | 0.70825 |
|                      | 0.4               | $\frac{H_f}{H_{10}} = 0.00132Bq - 4.00619$                                           | 0.87184 |
|                      | 0.6               | $\frac{H_f}{H_{10}} = 0.00156Bq - 1.07306$                                           | 0.93758 |
| $\zeta_p$            | 0.2               | $\frac{H_f}{H_{10}} = -1.508\zeta_p + 1.24257$                                       | 0.67863 |
|                      | 0.4               |                                                                                      |         |
|                      | 0.6               |                                                                                      |         |
| $\Theta$             | 0.2               | $\frac{H_f}{H_{10}} = e^{(0.020872\Theta^2 - 2.65715\Theta + 7.99997)}$              | 0.94397 |

|  |     |                                                                        |         |
|--|-----|------------------------------------------------------------------------|---------|
|  | 0.4 | $\frac{H_f}{H_{l0}} = e^{(0.08033\theta^2 - 1.29406\theta + 5.72904)}$ | 0.90474 |
|  | 0.6 | $\frac{H_f}{H_{l0}} = e^{(0.15265\theta^2 - 2.19106\theta + 8.98226)}$ | 0.95009 |



**Table S3.** Fitted equations for the relationship between the various dimensionless numbers and foaming expansion rate for 0.4 mM PFOA with different NaCl concentrations.

| Dimensionless number | $Q_{air}$ (L/min) | Equation                                                                             | $R^2$   |
|----------------------|-------------------|--------------------------------------------------------------------------------------|---------|
| $Re_b$               | 0.2               | $\frac{H_f}{H_{l0}} = 4.01841Re_b - 6.494$                                           | 0.96513 |
|                      | 0.4               | $\frac{H_f}{H_{l0}} = 10.00765Re_b - 9.24582$                                        | 0.7546  |
|                      | 0.6               | $\frac{H_f}{H_{l0}} = 8.83394Re_b - 1.86567$                                         | 0.96281 |
| $Ca$                 | 0.2               | $\frac{H_f}{H_{l0}} = e^{(-5.57 \times 10^{10}Ca^2 + 2.91 \times 10^6Ca - 37.1209)}$ | 0.77979 |
|                      | 0.4               | $\frac{H_f}{H_{l0}} = e^{(-1.09 \times 10^{10}Ca^2 + 1.11 \times 10^6Ca - 26.2504)}$ | 0.85435 |
|                      | 0.6               | $\frac{H_f}{H_{l0}} = e^{(-1.72 \times 10^9Ca^2 + 2.71 \times 10^5Ca - 8.63821)}$    | 0.77038 |
| $We_b$               | 0.2               | $\frac{H_f}{H_{l0}} = -1.71 \times 10^5We_b + 3.58111$                               | 0.93229 |
|                      | 0.4               | $\frac{H_f}{H_{l0}} = -1.47 \times 10^5We_b + 9.12474$                               | 0.73749 |
|                      | 0.6               | $\frac{H_f}{H_{l0}} = -1.56 \times 10^4We_b + 8.37155$                               | 0.60821 |
| $Fr_b$               | 0.2               | $\frac{H_f}{H_{l0}} = 66.9518Fr_b^{0.0493} - 45.51554$                               | 0.86342 |
|                      | 0.4               |                                                                                      |         |
|                      | 0.6               |                                                                                      |         |
| $\zeta_p$            | 0.2               | $\frac{H_f}{H_{l0}} = 0.58829\zeta_p - 0.28905$                                      | 0.85787 |
|                      | 0.4               |                                                                                      |         |
|                      | 0.6               |                                                                                      |         |
| $\Theta$             | 0.2               | $\frac{H_f}{H_{l0}} = 2.38586\Theta - 5.0019$                                        | 0.53985 |
|                      | 0.4               | $\frac{H_f}{H_{l0}} = 3.51757\Theta - 1.93135$                                       | 0.39088 |
|                      | 0.6               | $\frac{H_f}{H_{l0}} = 4.57481\Theta - 2.53595$                                       | 0.88125 |

**Table S4.** Fitted equations for the relationship between the various dimensionless numbers and foaming expansion rate for 0.4 mM KPFBS with two CaCl<sub>2</sub> concentrations.

| Dimensionless number | $Q_{air}$ (L/min) | Equation                                                                              | $R^2$   |
|----------------------|-------------------|---------------------------------------------------------------------------------------|---------|
| $Re_b$               | 0.6               | $\frac{H_f}{H_{l0}} = (1.31495 - 0.12052Re_b)^{\frac{1}{0.09908}}$                    | 0.70942 |
|                      | 0.8               |                                                                                       |         |
|                      | 1.0               |                                                                                       |         |
| $Ca$                 | 0.2               | $\frac{H_f}{H_{l0}} = e^{(-5.05 \times 10^{10}Ca^2 + 2.14 \times 10^6Ca - 22.18)}$    | 0.48255 |
|                      | 0.4               | $\frac{H_f}{H_{l0}} = e^{(-7.97 \times 10^{10}Ca^2 + 6.64 \times 10^6Ca - 136.8464)}$ | 0.54927 |
|                      | 0.6               | $\frac{H_f}{H_{l0}} = e^{(-1.25 \times 10^{10}Ca^2 + 1.58 \times 10^6Ca - 47.98364)}$ | 0.78938 |
|                      | 0.8               | $\frac{H_f}{H_{l0}} = e^{(-8.71 \times 10^9Ca^2 + 1.48 \times 10^6Ca - 61.02557)}$    | 0.63319 |
|                      | 1.0               | $\frac{H_f}{H_{l0}} = e^{(-3.30 \times 10^9Ca^2 + 6.90 \times 10^5Ca - 33.80138)}$    | 0.93183 |
| $We_b$               | 0.6               | $\frac{H_f}{H_{l0}} = 0.00261We_b^{-0.75396}$                                         | 0.49497 |
|                      | 0.8               | $\frac{H_f}{H_{l0}} = 3.28 \times 10^{-6}We_b^{-1.51664}$                             | 0.82483 |
|                      | 1.0               | $\frac{H_f}{H_{l0}} = 4.19 \times 10^{-4}We_b^{-1.07105}$                             | 0.86344 |
| $Fr_b$               | 0.6               | $\frac{H_f}{H_{l0}} = 666.54643Fr_b - 0.16715$                                        | 0.58216 |
|                      | 0.8               | $\frac{H_f}{H_{l0}} = 497.94522Fr_b - 2.4526$                                         | 0.76269 |
|                      | 1.0               | $\frac{H_f}{H_{l0}} = 352.70274Fr_b - 2.3281$                                         | 0.92017 |
| $\zeta_p$            | 0.2               | $\frac{H_f}{H_{l0}} = 0.6598\zeta_p - 0.6121$                                         | 0.62076 |
|                      | 0.4               |                                                                                       |         |
|                      | 0.6               |                                                                                       |         |
|                      | 0.8               |                                                                                       |         |
|                      | 1.0               |                                                                                       |         |

**Table S5.** Foaming parameters and experimental values for KPFOs aqueous solutions used for dimensional analysis of foaming expansion rate with  $D_c = 0.05\text{ m}$ ,  $D_f = 0.00007\text{ m}$ ,  $\rho = 990\text{ kg/m}^3$ ,  $\eta = 0.001\text{ kg/s}\cdot\text{m}$ .

| KPFOs concentration (ppm) | $Q_{air}$ ( $\text{m}^3/\text{s}$ ) | $t_e$ (s) | Equilibrium? | $\gamma$ (N/m) | $E$ (N/m) | $\eta_s$ (N·s/m) | $Re_b$ | $Ca$  | $We_b$ | $Fr_b$ | $Bq$  | $\theta$ | $\zeta_p$ | $\frac{R}{H_{10}}$ | $\frac{H_f}{H_{10}}$ |
|---------------------------|-------------------------------------|-----------|--------------|----------------|-----------|------------------|--------|-------|--------|--------|-------|----------|-----------|--------------------|----------------------|
| 100                       | 3E-06                               | 104.9     | Yes          | 0.0523738      | 0.013956  | 0.0018475        | 0.215  | 3E-05 | 5E-06  | 0.001  | 11334 | 4.127    | 98.01     | 0.011              | 10.92                |
| 100                       | 3E-06                               | 93.55     | Yes          | 0.0523738      | 0.013956  | 0.0018475        | 0.275  | 3E-05 | 7E-06  | 9E-04  | 8882  | 4.127    | 87.43     | 0.014              | 4.379                |
| 200                       | 3E-06                               | 95.68     | Yes          | 0.0435405      | 0.0161413 | 0.0014776        | 0.232  | 3E-05 | 7E-06  | 0.001  | 8396  | 2.816    | 89.42     | 0.012              | 9.726                |
| 200                       | 3E-06                               | 87.96     | Yes          | 0.0435405      | 0.0161413 | 0.0014776        | 0.218  | 3E-05 | 7E-06  | 0.001  | 8955  | 2.816    | 82.2      | 0.011              | 11.32                |
| 300                       | 3E-06                               | 21.33     | Yes          | 0.0420005      | 0.0127471 | 0.0014075        | 0.305  | 3E-05 | 1E-05  | 8E-04  | 6093  | 3.513    | 19.93     | 0.015              | 3.41                 |
| 300                       | 3E-06                               | 22.73     | Yes          | 0.0420005      | 0.0127471 | 0.0014075        | 0.367  | 3E-05 | 1E-05  | 7E-04  | 5063  | 3.513    | 21.24     | 0.018              | 4.902                |
| 400                       | 3E-06                               | 13.49     | Yes          | 0.0394964      | 0.0097478 | 0.0010724        | 0.352  | 3E-05 | 1E-05  | 7E-04  | 4017  | 4.318    | 12.61     | 0.017              | 2.526                |
| 500                       | 3E-06                               | 16.97     | Yes          | 0.0381165      | 0.0068885 | 0.0011099        | 0.425  | 3E-05 | 1E-05  | 6E-04  | 3447  | 6.416    | 15.86     | 0.021              | 1.1                  |
| 10                        | 7E-06                               | 17.78     | Yes          | 0.0623411      | 0.0078525 | 0.0010023        | 0.594  | 4E-05 | 3E-05  | 0.003  | 4455  | 8.666    | 33.23     | 0.015              | 2.585                |
| 10                        | 7E-06                               | 19.29     | Yes          | 0.0623411      | 0.0078525 | 0.0010023        | 1.038  | 4E-05 | 4E-05  | 0.002  | 2550  | 8.666    | 36.06     | 0.026              | 0.648                |
| 300                       | 7E-06                               | 39.17     | Yes          | 0.0420005      | 0.0127471 | 0.0014075        | 0.282  | 6E-05 | 2E-05  | 0.007  | 13154 | 3.513    | 73.21     | 0.007              | 12.01                |
| 300                       | 7E-06                               | 42.46     | Yes          | 0.0420005      | 0.0127471 | 0.0014075        | 0.425  | 6E-05 | 3E-05  | 0.005  | 8742  | 3.513    | 79.36     | 0.011              | 8.731                |
| 400                       | 7E-06                               | 40.6      | Yes          | 0.0394964      | 0.0097478 | 0.0010724        | 0.285  | 7E-05 | 2E-05  | 0.007  | 9930  | 4.318    | 75.89     | 0.007              | 12.41                |
| 500                       | 7E-06                               | 22.9      | Yes          | 0.0381165      | 0.0068885 | 0.0011099        | 0.499  | 7E-05 | 3E-05  | 0.004  | 5873  | 6.416    | 42.8      | 0.012              | 2.513                |
| 500                       | 7E-06                               | 45.47     | Yes          | 0.0381165      | 0.0068885 | 0.0011099        | 0.52   | 7E-05 | 4E-05  | 0.004  | 5634  | 6.416    | 84.99     | 0.013              | 2.821                |
| 500                       | 7E-06                               | 48.35     | Yes          | 0.0381165      | 0.0068885 | 0.0011099        | 0.412  | 7E-05 | 3E-05  | 0.005  | 7115  | 6.416    | 90.37     | 0.01               | 4.13                 |
| 600                       | 7E-06                               | 17.58     | Yes          | 0.032702       | 0.0063839 | 0.001128         | 0.48   | 8E-05 | 4E-05  | 0.004  | 6198  | 6.159    | 32.86     | 0.012              | 3.358                |
| 600                       | 7E-06                               | 24.07     | Yes          | 0.032702       | 0.0063839 | 0.001128         | 0.523  | 8E-05 | 4E-05  | 0.004  | 5697  | 6.159    | 44.99     | 0.013              | 2.395                |
| 600                       | 7E-06                               | 25.57     | Yes          | 0.032702       | 0.0063839 | 0.001128         | 0.335  | 8E-05 | 3E-05  | 0.006  | 8882  | 6.159    | 47.79     | 0.008              | 7.73                 |
| 10                        | 1E-05                               | 16.87     | Yes          | 0.0623411      | 0.0078525 | 0.0010023        | 1.156  | 6E-05 | 7E-05  | 0.006  | 3433  | 8.666    | 47.3      | 0.019              | 4.385                |
| 10                        | 1E-05                               | 18.88     | Yes          | 0.0623411      | 0.0078525 | 0.0010023        | 2.095  | 6E-05 | 1E-04  | 0.003  | 1895  | 8.666    | 52.93     | 0.035              | 2.526                |
| 10                        | 1E-05                               | 18.7      | Yes          | 0.0623411      | 0.0078525 | 0.0010023        | 1.612  | 6E-05 | 1E-04  | 0.004  | 2463  | 8.666    | 52.43     | 0.027              | 3.135                |
| 400                       | 1E-05                               | 34.71     | Yes          | 0.0394964      | 0.0097478 | 0.0010724        | 0.475  | 1E-04 | 5E-05  | 0.014  | 8937  | 4.318    | 97.32     | 0.008              | 13.61                |
| 500                       | 1E-05                               | 48.05     | Yes          | 0.0381165      | 0.0068885 | 0.0011099        | 0.741  | 1E-04 | 8E-05  | 0.009  | 5935  | 6.416    | 134.7     | 0.012              | 9.098                |
| 500                       | 1E-05                               | 41.8      | Yes          | 0.0381165      | 0.0068885 | 0.0011099        | 0.606  | 1E-04 | 6E-05  | 0.011  | 7254  | 6.416    | 117.2     | 0.01               | 9.988                |

|     |       |       |     |          |           |          |       |       |       |       |      |       |       |       |       |
|-----|-------|-------|-----|----------|-----------|----------|-------|-------|-------|-------|------|-------|-------|-------|-------|
| 600 | 1E-05 | 17.67 | Yes | 0.032702 | 0.0063839 | 0.001128 | 0.824 | 1E-04 | 1E-04 | 0.008 | 5423 | 6.159 | 49.54 | 0.014 | 6.211 |
| 600 | 1E-05 | 14.47 | Yes | 0.032702 | 0.0063839 | 0.001128 | 0.939 | 1E-04 | 1E-04 | 0.007 | 4760 | 6.159 | 40.57 | 0.016 | 6.682 |
| 600 | 1E-05 | 18.65 | Yes | 0.032702 | 0.0063839 | 0.001128 | 0.939 | 1E-04 | 1E-04 | 0.007 | 4760 | 6.159 | 52.29 | 0.016 | 4.614 |

**Table S6.** Foaming parameters and experimental values for 0.4 mM PFOA aqueous solutions containing varied concentrations of NaCl used for dimensional analysis of foaming expansion rate with  $D_c = 0.05\text{ m}$ ,  $D_f = 0.00007\text{ m}$ ,  $\rho = 990\text{ kg/m}^3$ ,  $\eta = 0.001\text{ kg/s}\cdot\text{m}$ .

| NaCl concentration (mM) | $Q_{air}\text{ (m}^3\text{/s)}$ | $t_e\text{ (s)}$ | Equilibrium? | $\gamma\text{ (N/m)}$ | $E\text{ (N/m)}$ | $\eta_s\text{ (N}\cdot\text{s/m)}$ | $Re_b$  | $Ca$     | $We_b$   | $Fr_b$   | $Bq$     | $\Theta$ | $\zeta_p$ | $\frac{R}{H_{10}}$ | $\frac{H_f}{H_{10}}$ |
|-------------------------|---------------------------------|------------------|--------------|-----------------------|------------------|------------------------------------|---------|----------|----------|----------|----------|----------|-----------|--------------------|----------------------|
| 10                      | 3E-06                           | 11.85            | Yes          | 0.054358              | 0.003888         | 0.000627                           | 0.18744 | 2.45E-05 | 4.6E-06  | 0.001277 | 4416.146 | 13.98273 | 11.07447  | 0.009294           | 2.814343             |
| 50                      | 3E-06                           | 20.38            | Yes          | 0.051833              | 0.004609         | 0.00075                            | 0.21648 | 2.57E-05 | 5.57E-06 | 0.001105 | 4571.279 | 11.24561 | 19.04622  | 0.010734           | 2.578724             |
| 100                     | 3E-06                           | 20.51            | Yes          | 0.049115              | 0.003541         | 0.000638                           | 0.23496 | 2.71E-05 | 6.38E-06 | 0.001018 | 3582.166 | 13.8722  | 19.16771  | 0.01165            | 2.513274             |
| 0                       | 7E-06                           | 14.32            | Yes          | 0.052562              | 0.009497         | 0.00086                            | 0.5808  | 5.07E-05 | 2.95E-05 | 0.003296 | 3906.82  | 5.534512 | 26.76564  | 0.014399           | 3.756821             |
| 0                       | 7E-06                           | 18.1             | Yes          | 0.052562              | 0.009497         | 0.00086                            | 0.528   | 5.07E-05 | 2.68E-05 | 0.003626 | 4297.502 | 5.534512 | 33.83087  | 0.01309            | 4.25424              |
| 0.5                     | 7E-06                           | 13.09            | Yes          | 0.057208              | 0.008201         | 0.000947                           | 0.6468  | 4.66E-05 | 3.01E-05 | 0.00296  | 3864.334 | 6.976007 | 24.46664  | 0.016035           | 4.07098              |
| 0.5                     | 7E-06                           | 20.67            | Yes          | 0.057208              | 0.008201         | 0.000947                           | 0.48048 | 4.66E-05 | 2.24E-05 | 0.003984 | 5201.988 | 6.976007 | 38.63448  | 0.011912           | 4.457135             |
| 0.5                     | 7E-06                           | 19.06            | Yes          | 0.057208              | 0.008201         | 0.000947                           | 0.60456 | 4.66E-05 | 2.82E-05 | 0.003167 | 4134.331 | 6.976007 | 35.62522  | 0.014988           | 4.457135             |
| 1                       | 7E-06                           | 50.29            | Yes          | 0.056617              | 0.007263         | 0.001171                           | 0.48576 | 4.71E-05 | 2.29E-05 | 0.003941 | 6364.537 | 7.79571  | 93.9975   | 0.012043           | 6.080291             |
| 1                       | 7E-06                           | 54.76            | Yes          | 0.056617              | 0.007263         | 0.001171                           | 0.52272 | 4.71E-05 | 2.46E-05 | 0.003662 | 5914.519 | 7.79571  | 102.3524  | 0.012959           | 6.636614             |
| 5                       | 7E-06                           | 38.71            | Yes          | 0.056704              | 0.005839         | 0.000771                           | 0.3432  | 4.7E-05  | 1.61E-05 | 0.005578 | 5929.746 | 9.711208 | 72.35321  | 0.008508           | 5.622142             |
| 5                       | 7E-06                           | 45.56            | Yes          | 0.056704              | 0.005839         | 0.000771                           | 0.36168 | 4.7E-05  | 1.7E-05  | 0.005293 | 5626.766 | 9.711208 | 85.15661  | 0.008967           | 5.078908             |
| 10                      | 7E-06                           | 25.76            | Yes          | 0.054358              | 0.003888         | 0.000627                           | 0.35112 | 4.91E-05 | 1.72E-05 | 0.005452 | 4714.983 | 13.98273 | 48.14825  | 0.008705           | 6.780604             |
| 10                      | 7E-06                           | 36.6             | Yes          | 0.054358              | 0.003888         | 0.000627                           | 0.43824 | 4.91E-05 | 2.15E-05 | 0.004368 | 3777.667 | 13.98273 | 68.40939  | 0.010865           | 6.643159             |
| 10                      | 7E-06                           | 53.45            | Yes          | 0.054358              | 0.003888         | 0.000627                           | 0.41712 | 4.91E-05 | 2.05E-05 | 0.004589 | 3968.942 | 13.98273 | 99.90388  | 0.010341           | 6.636614             |
| 50                      | 7E-06                           | 45.74            | Yes          | 0.051833              | 0.004609         | 0.00075                            | 0.34056 | 5.14E-05 | 1.75E-05 | 0.005621 | 5811.549 | 11.24561 | 85.49305  | 0.008443           | 6.734789             |
| 100                     | 7E-06                           | 25.6             | Yes          | 0.049115              | 0.003541         | 0.000638                           | 0.51744 | 5.43E-05 | 2.81E-05 | 0.0037   | 3253.192 | 13.8722  | 47.84919  | 0.012828           | 5.059273             |
| 100                     | 7E-06                           | 37.55            | Yes          | 0.049115              | 0.003541         | 0.000638                           | 0.50952 | 5.43E-05 | 2.77E-05 | 0.003757 | 3303.76  | 13.8722  | 70.18505  | 0.012632           | 5.137813             |
| 200                     | 7E-06                           | 17.07            | Yes          | 0.046207              | 0.00411          | 0.000744                           | 0.55704 | 5.77E-05 | 3.21E-05 | 0.003437 | 3526.18  | 11.24333 | 31.90569  | 0.01381            | 4.45059              |
| 200                     | 7E-06                           | 40.52            | Yes          | 0.046207              | 0.00411          | 0.000744                           | 0.63096 | 5.77E-05 | 3.64E-05 | 0.003034 | 3113.071 | 11.24333 | 75.7363   | 0.015643           | 4.16261              |

|     |       |       |     |          |          |          |         |          |          |          |          |          |          |          |          |
|-----|-------|-------|-----|----------|----------|----------|---------|----------|----------|----------|----------|----------|----------|----------|----------|
| 200 | 7E-06 | 15.54 | Yes | 0.046207 | 0.00411  | 0.000744 | 0.6732  | 5.77E-05 | 3.89E-05 | 0.002844 | 2917.741 | 11.24333 | 29.04596 | 0.01669  | 4.005531 |
| 0   | 1E-05 | 29.89 | Yes | 0.052562 | 0.009497 | 0.00086  | 1.15632 | 7.61E-05 | 8.8E-05  | 0.005587 | 2943.494 | 5.534512 | 83.80151 | 0.019111 | 7.016224 |
| 0.5 | 1E-05 | 23.7  | Yes | 0.057208 | 0.008201 | 0.000947 | 1.01376 | 6.99E-05 | 7.09E-05 | 0.006373 | 3698.288 | 6.976007 | 66.44683 | 0.016755 | 6.675884 |
| 0.5 | 1E-05 | 28.72 | Yes | 0.057208 | 0.008201 | 0.000947 | 0.94644 | 6.99E-05 | 6.62E-05 | 0.006827 | 3961.347 | 6.976007 | 80.52122 | 0.015643 | 6.531895 |
| 1   | 1E-05 | 36.35 | Yes | 0.056617 | 0.007263 | 0.001171 | 0.83952 | 7.06E-05 | 5.93E-05 | 0.007696 | 5523.938 | 7.79571  | 101.9132 | 0.013875 | 7.579092 |
| 1   | 1E-05 | 30.72 | Yes | 0.056617 | 0.007263 | 0.001171 | 0.9108  | 7.06E-05 | 6.43E-05 | 0.007094 | 5091.63  | 7.79571  | 86.12855 | 0.015053 | 7.009679 |
| 5   | 1E-05 | 16.28 | Yes | 0.056704 | 0.005839 | 0.000771 | 0.54648 | 7.05E-05 | 3.85E-05 | 0.011823 | 5585.993 | 9.711208 | 45.64364 | 0.009032 | 7.297658 |
| 5   | 1E-05 | 22.47 | Yes | 0.056704 | 0.005839 | 0.000771 | 0.82368 | 7.05E-05 | 5.81E-05 | 0.007844 | 3706.091 | 9.711208 | 62.99832 | 0.013614 | 7.225663 |
| 5   | 1E-05 | 24.65 | Yes | 0.056704 | 0.005839 | 0.000771 | 0.58608 | 7.05E-05 | 4.13E-05 | 0.011024 | 5208.561 | 9.711208 | 69.11031 | 0.009687 | 6.780604 |
| 10  | 1E-05 | 33.55 | Yes | 0.054358 | 0.003888 | 0.000627 | 0.693   | 7.36E-05 | 5.1E-05  | 0.009323 | 3583.387 | 13.98273 | 94.06291 | 0.011454 | 7.736172 |
| 10  | 1E-05 | 33.16 | Yes | 0.054358 | 0.003888 | 0.000627 | 0.59796 | 7.36E-05 | 4.4E-05  | 0.010805 | 4152.932 | 13.98273 | 92.96949 | 0.009883 | 7.101308 |
| 50  | 1E-05 | 41.59 | Yes | 0.051833 | 0.004609 | 0.00075  | 0.80784 | 7.72E-05 | 6.23E-05 | 0.007998 | 3674.95  | 11.24561 | 116.6044 | 0.013352 | 7.611817 |
| 100 | 1E-05 | 36.97 | Yes | 0.049115 | 0.003541 | 0.000638 | 0.68508 | 8.14E-05 | 5.58E-05 | 0.009431 | 3685.697 | 13.8722  | 103.6514 | 0.011323 | 7.644542 |
| 200 | 1E-05 | 33.53 | Yes | 0.046207 | 0.00411  | 0.000744 | 0.83952 | 8.66E-05 | 7.27E-05 | 0.007696 | 3509.547 | 11.24333 | 94.00684 | 0.013875 | 7.232208 |

**Table S7.** Summary table for the universal equations of KPFOs, PFOA, and KPFBs aqueous foams.

| PFAS  | Monomial form                                                                                                                                                                                                                                                                                | R <sup>2</sup> |
|-------|----------------------------------------------------------------------------------------------------------------------------------------------------------------------------------------------------------------------------------------------------------------------------------------------|----------------|
| KPFOs | $\frac{H_f}{H_{l0}} = 1587.63 \cdot Re^{-1.72} \cdot e^{(-9.00 \times 10^7 \cdot Ca^2 + 2.00 \times 10^4 \cdot Ca)} \cdot We^{-0.44} \cdot Fr_b^{1.02} \cdot Bq^{0.72} \cdot e^{(0.097 \cdot \Theta^2 - 1.07 \cdot \Theta)} \cdot \zeta_p^{0.45} \cdot \left(\frac{R}{H_{l0}}\right)^{2.85}$ | 0.86605        |
| PFOA  | $\frac{H_f}{H_{l0}} = 3.06 \cdot e^{(-1.00 \times 10^8 \cdot Ca^2 + 1.00 \times 10^4 \cdot Ca)} \cdot Fr_b^{0.41} \cdot Bq^{0.38} \cdot \Theta^{0.26} \cdot \zeta_p^{0.16} \cdot \left(\frac{R}{H_{l0}}\right)^{0.42}$                                                                       | 0.96797        |
| KPFBS | $\frac{H_f}{H_{l0}} = 12.30 * e^{(-4.00 \times 10^7 * Ca^2)} * Fr_b^{0.51} * \zeta_p^{0.37}$                                                                                                                                                                                                 | 0.73937        |

### Determining fitting coefficients in dimensional analysis

Generally, the *Equations (9)* can be rewritten to a monomial form as shown below to predict the foaming behavior, herein foaming expansion rate:

$$\frac{H_f}{H_{l0}} = C_0 * Re_b^a * Ca^b * We_b^c * Fr_b^d * Bq^e * \Theta^f * \zeta_p^g * \left(\frac{R}{H_{l0}}\right)^h * \left(\frac{D_c}{H_{l0}}\right)^i * \left(\frac{D_f}{H_{l0}}\right)^j \quad \text{Equation (S1)}$$

where  $C_0, a, b, c, d, e, f, g, h,$  and  $i$  are constants need to be fitted.

In this work, the Solver function in Excel spreadsheet is used to obtain the as-mentioned coefficients. The *Equation (S1)* is taken the natural logarithm to linearize the equation prior to applying the Solver function. 0.5 is used as the initial guess for all coefficients. The *Equation (S2)* shown below is set as the objective which needs to be the smallest in the Solver function to obtain the coefficients.

$$O = \frac{\sum_{i=1}^n \sqrt{|y_i - \hat{y}_i|}}{n} \quad \text{Equation (S2)}$$

where  $y_i$  is the observed value,  $\hat{y}_i$  is the predicted value,  $n$  is the sample size. In some cases, the coefficients need to be manually adjusted to obtain the relatively small  $O$  for the prediction after the first run of Solver function by using 0.5 as the initial values. Once the coefficients are obtained, the predicted values vs the experimental values are plotted to verify the goodness of fitting. To further determine how well the model fits the data, the  $R^2$  of the model fitting is calculated according to the equations below:

$$\sum_{i=1}^n e_i = \sum_{i=1}^n (y_i - a_0 - a_1 m_i - a_2 n_i - \dots - a_j p_i) \quad \text{Equation (S3a)}$$

$$S_r = \sum_{i=1}^n (e_i)^2 = \sum_{i=1}^n (y_i - a_0 - a_1 m_i - a_2 n_i - \dots - a_j p_i)^2 \quad \text{Equation (S3b)}$$

$$S_t = \sum_{i=1}^n (y_i - \bar{y})^2 \quad \text{Equation (S3c)}$$

$$R^2 = \frac{S_t - S_r}{S_t} \quad \text{Equation (S3d)}$$

where  $e_i$  is the error or called residual,  $a_i$  is the coefficients,  $m_i, n_i, \dots, p_i$  are the independent variables,  $S_r$  is the residual sum of squares,  $S_t$  is the total sum of squares,  $\bar{y}$  is the mean of the experimental values,  $R^2$  is the coefficient of determination.
